# Supplementary material
Source: HighWire-hosted journal article supplement (https://cmaj.ca/highwire/filestream/58471/field_highwire_adjunct_files/0/pg783.pdf)
Supplement: pg783.pdf [file pg783.pdf]

## PRODUCTION

Production Manager • Gestionnaire de la production  
Kathryn A. Freamo

Production Assistants • Assistantes à la production  
Nicole Barbeau, Lianne Johnsen, Carole Lalonde

## ADVERTISING • PUBLICITÉ

Manager, Journal Advertising  
Gestionnaire, Annonces publicitaires  
Beverley Kirkpatrick

Coordinator, Display Advertising  
Coordonnatrice de la publicité  
Nancy Pope

Assistant Manager, Classified Advertising  
Gestionnaire adjointe, annonces classées  
Deborah Rodd

613 731-9331, fax 613 565-7488  
advertising@cma.ca

For information on how to advertise  
in any of the CMA journals  
[www.cma.ca](http://www.cma.ca)

Pour savoir comment placer une annonce  
dans les revues publiées par l'AMC  
[www.cma.ca](http://www.cma.ca)

Marketing and Advertising Sales  
Marketing et publicité  
Keith Health Care Inc.

|                  |                  |
|------------------|------------------|
| <b>Toronto</b>   | <b>Montréal</b>  |
| 905 278-6700     | 514 624-6979     |
| 800 661-5004     | 877 761-0447     |
| fax 905 278-4850 | fax 514 624-6700 |

All prescription drug advertisements have been cleared by the Pharmaceutical Advertising Advisory Board.

Toutes les annonces de médicaments prescrits ont été approuvées par le Conseil consultatif de publicité pharmaceutique.

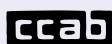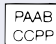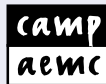

ASSOCIATION  
MÉDICALE  
CANADIENNE

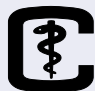

CANADIAN  
MEDICAL  
ASSOCIATION

President • Président  
Hugh Scully, MD CM, MSc

Secretary General • Secrétaire général  
Peter W. Vaughan, MD, MPH

Director, Professional Development  
Directeur, Développement professionnel  
Barbara Drew

Manager, Publishing Services  
Gestionnaire, Services de publication  
Jill Rafuse

Publications Committee • Comité des publications  
Stuart M. MacLeod, MD (Chairman • Président)  
Henry Haddad, MD  
Philip F. Hall, MD  
Barbara P. Lent, MD  
D'Arcy Lawrence Little, MD  
Jonathan L. Meakins, MD  
Mark Roper, MD  
W. Grant Thompson, MD

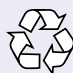

Printed on recycled paper • Imprimé sur papier recyclé

## Mot du rédacteur en chef

English on previous page

Table des matières du 5 octobre 1999

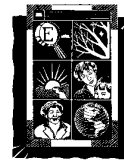

### Osler : la réputation et l'homme

Les lecteurs qui remarquent l'espace que nous avons consacré dans ce numéro à souligner le 150<sup>e</sup> anniversaire de naissance de Sir William Osler se sont probablement sentis intrigués ou ennuyés. En préparant ce numéro, notre volonté d'en apprendre davantage au sujet du D<sup>r</sup> Osler a été tempérée par le scepticisme que suscite toute réputation aussi durable que la sienne. Cet homme était-il vraiment un grand médecin ou son époque avait-elle besoin de créer une célébrité médicale? Était-il médecin ou politicien, maître ou magicien? Pourquoi y a-t-il tellement de gens qui chérissent sa vie et ses écrits, en savourent les anecdotes, au point parfois de devenir presque sirupeux ou sentimentaux?

Le D<sup>r</sup> Osler maîtrisait certainement les mots. Un coup d'œil rapide sur son manuel qui a fixé la norme, soit *The Principles and Practice of Medicine*, révèle une maîtrise exceptionnelle de la langue anglaise. Sa prose est d'une qualité que les médecins atteignent rarement et ses allocutions publiques ont suscité l'admiration de générations. Cela dit, l'essence de son conseil est parfois surannée, voire un peu troublante, pour l'époque postvictorienne. Que faudrait-il penser, par exemple, du fait qu'il exhorte les jeunes étudiants à mettre en veilleuse leurs sentiments à l'égard du sexe opposé pendant leurs études en médecine?

Il faudrait admettre que les horizons du D<sup>r</sup> Osler étaient limités par son époque. En adoptant, par exemple, le modèle Johns Hopkins, le D<sup>r</sup> Osler ne semble pas avoir reconnu que l'exercice de la médecine a une assise intellectuelle qu'il est impossible d'expliquer par la science seulement. La pensée réformiste qui guidait l'éducation médicale à l'époque du D<sup>r</sup> Osler et a atteint son point culminant dans la publication, en 1910, de l'ouvrage d'Abraham

Flexner intitulé *Reports* mettait l'accent sur l'importance d'une base en sciences de laboratoire qui a servi à débarrasser la profession d'un grand nombre de ses charlatans. En revanche, on n'a pas prévu l'apparition de l'assise conceptuelle de l'exercice de la médecine, qui inclut nos concepts de la santé, de la maladie, du diagnostic, du pronostic et de l'intervention, pour en nommer quelques-uns seulement des plus évidents. Par exemple, le manuel du D<sup>r</sup> Osler commence par la typhoïde, sans introduction, comme on en trouve dans les manuels modernes, aux éléments fondamentaux de la *pratique*.

Osler l'homme est peut-être encore plus mystérieux. Il est très difficile en rétrospective de découvrir la personne derrière le personnage public. En fouillant dans des placards biographiques, l'historien Michael Bliss n'y a trouvé aucun squelette. Nous pourrions quand même nous demander comme M<sup>me</sup> Osler, l'infatigable hôtesse, se sentait face à la circulation incessante de jeunes médecins visiteurs, ou nous interroger sur la relation bancale qui existait entre le D<sup>r</sup> Osler et son propre fils, avec lequel il a réussi à avoir des échanges positifs seulement vers la fin de la brève vie de Revere, grâce au plaisir mutuel qu'ils tiraient de la littérature de la Renaissance sur la pêche. Il est difficile de faire correspondre ces questions à l'image projetée par tant d'amis et d'auteurs.

Il semble que la grandeur véritable résiste aux défis posés par le temps et la recherche, tandis que la fausse grandeur finit par être exposée. Quatre-vingts ans et deux importantes biographies plus tard, le souvenir du D<sup>r</sup> Osler persiste avec une chaleur qui échappe à toute explication. Rendons hommage à un grand médecin et préservons ce que nous savons de lui qui a une valeur durable.
